# Supplementary material
Source: Springer Nature journal article supplement (https://www.springermedizin.de/resource/supplementary/12958_2003_80_MOESM2_ESM.pdf/9566356)

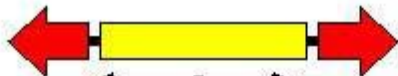

*Germline transgenesis*

*Somatic cell transgenesis*

*Germline insertional mutagenesis*

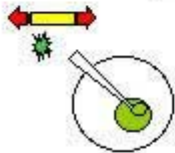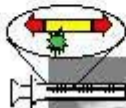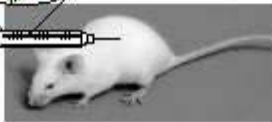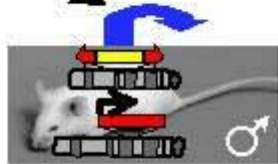

Supplement: MOESM2 [file 9566356]
